# Supplementary material for: Effective heterogeneous Fenton-like degradation of antibiotics by ferroferric oxide nanoparticle coated reduced iron powder with accelerated Fe(ii)/Fe(iii) redox cycling
Source: Royal Society of Chemistry journal article supplement (doi:10.1039/d3en00272a), 2023-01-01
Supplement: d3en00272a1.pdf [file d3en00272a1.pdf]

## *Supplementary materials*

# **Effective Heterogeneous Fenton-Like Degradation of Antibiotics by Ferroferric Oxide Nanoparticle Coated Reduced Iron Powder with Accelerated Fe(II)/Fe(III) Redox Cycling**

Jiahui Zhou <sup>a</sup>, Xuesong Li <sup>a,\*</sup>, Qiuying Yi <sup>a</sup>, Zhiwei Wang <sup>a,b,\*</sup>

<sup>a</sup> State Key Laboratory of Pollution Control and Resources Reuse, School of Environmental Science and Engineering, Tongji University, Shanghai, 200092, PR China

<sup>b</sup> Shanghai Institute of Pollution Control and Ecological Security, Shanghai, 200092, PR China

\*Corresponding authors. E-mail addresses: [xuesong\\_li@tongji.edu.cn](mailto:xuesong_li@tongji.edu.cn) (X. Li);  
[zwwang@tongji.edu.cn](mailto:zwwang@tongji.edu.cn) (Z. Wang)

4 Figures

7 Tables

8 Pages

## **Text S1**

### **Preparation of FONP@RIP**

Firstly, RIP with a diameter of approximately 100  $\mu\text{m}$ , which was utilized as the iron core for FONP@RIP, was vacuum-dried at 378 K for 24 h. Then,  $\text{FeCl}_3 \cdot 6\text{H}_2\text{O}$  (3.9 g) and  $\text{FeCl}_2 \cdot 4\text{H}_2\text{O}$  (1.4 g) were dissolved in a beaker with 450 mL ultrapure water at 70  $^\circ\text{C}$ , following with an addition of RIP (1.18 g) into the solution, then NaOH (50 mL) solution was injected (concentration: 5M; velocity: 10 mL/min) into the mixture. The suspension was kept mechanical stirring for 1 h and then maturing for 2 h. After separation, the collected particles were washed several times with deionized water until the pH of washing solution became neutral. At last, the particles were dried by freeze-drying.

## **Text S2**

### **Analysis of TC and Intermediates**

The residual concentration of TC was quantified by high-performance liquid chromatography (HPLC, 1200 Infinity, Agilent, USA) equipped with a Zorbax Eclipse XDB-C18 column (4.6 mm  $\times$  150 mm, 5  $\mu\text{m}$ , Agilent, USA). The mixed solvent of sodium dihydrogen phosphate solution (0.01 mol/L) and acetonitrile (65:35, v/v) was used as the mobile phase. The column temperature was maintained at 25  $^\circ\text{C}$  and the flow rate of the mobile phase was kept at 1 mL/min. The injection volume of samples was 10  $\mu\text{L}$  and the wavelength for detection was 360 nm.

The intermediates of TC were identified by UPLC-MS (1290 UPLC/Q-TOF 6550, Agilent, USA) by using a mixture of formic acid solution (0.1%, m/m) and acetonitrile (90:10, v/v) as the mobile phase. The column temperature was set at 40 $^\circ\text{C}$  and the injection volume was 5  $\mu\text{L}$ . The flow rate of the mobile phase was kept at 0.3 mL/min. TC and intermediates were estimated using ESI in positive ion mode.

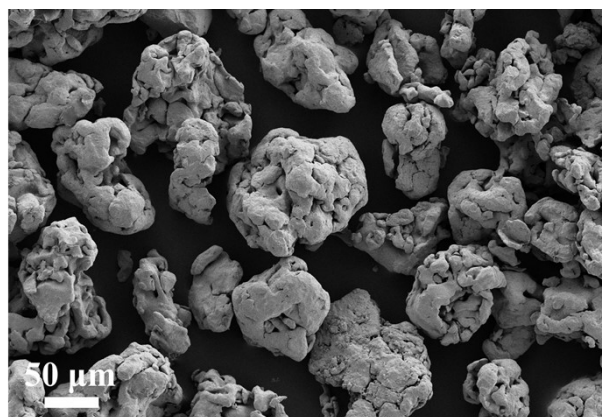

**Fig. S1.** SEM image of RIP.

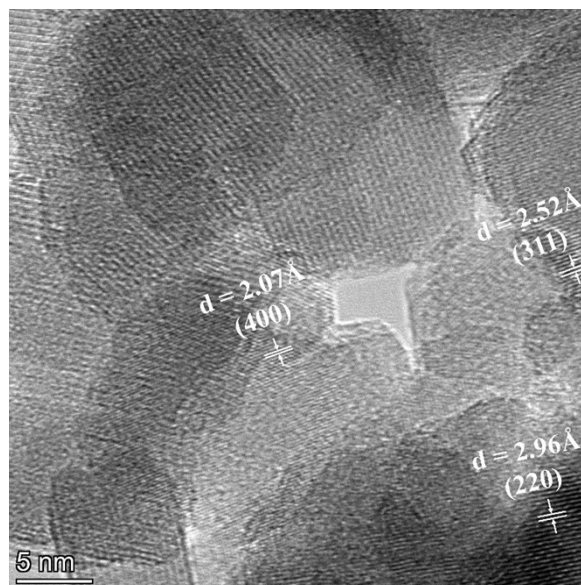

**Fig. S2.** HRTEM image of FONP@RIP.

**Table S1.** Relative atomic percentages of Fe 2p on RIP, FONP, and FONP@RIP.

| Sample   | Fe <sup>0</sup><br>(Fe 2p <sub>3/2</sub> ) | Fe (II)<br>(Fe 2p <sub>3/2</sub> ) | Fe (III)<br>(Fe 2p <sub>3/2</sub> ) | Fe (III)<br>(Fe 2p <sub>3/2</sub> satellite) | Fe <sup>0</sup><br>(Fe 2p <sub>1/2</sub> ) | Fe (III)<br>(Fe 2p <sub>1/2</sub> ) |
|----------|--------------------------------------------|------------------------------------|-------------------------------------|----------------------------------------------|--------------------------------------------|-------------------------------------|
| RIP      | 1.4%                                       | 67.1%                              | n.d.                                | n.d.                                         | 1.7%                                       | 29.8%                               |
| FONP     | n.d.                                       | 15.9%                              | 51.6%                               | 4.0%                                         | n.d.                                       | 28.5%                               |
| FONP@RIP | n.d.                                       | 16.3%                              | 49.5%                               | 6.7%                                         | n.d.                                       | 27.5%                               |

n.d.: not detected.

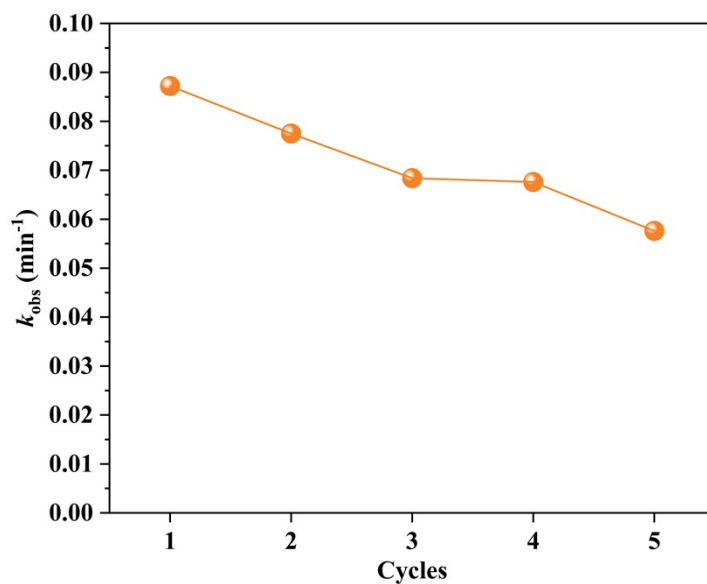

**Fig. S3.** The analysis of pseudo-first-order kinetics in the FONP@RIP/H<sub>2</sub>O<sub>2</sub> system. ( $[\text{TC}]_0 = 150$  ppm, FONP@RIP dosage = 0.5 g/L,  $[\text{H}_2\text{O}_2]_0 = 5$  mM, and initial pH = 3).

**Table S2.** The kinetic parameters of TC degradation in the FONP@RIP/H<sub>2</sub>O<sub>2</sub> system.

| Cycle | $k_{obs}$ ( $\text{min}^{-1}$ ) | $R^2$  |
|-------|---------------------------------|--------|
| 1     | 0.0872                          | 0.9329 |
| 2     | 0.0775                          | 0.9863 |
| 3     | 0.0684                          | 0.9966 |
| 4     | 0.0676                          | 0.9953 |
| 5     | 0.0576                          | 0.9941 |

**Table S3.** Relative atomic percentages of Fe 2p on FONP@RIP after H<sub>2</sub>O<sub>2</sub> activation.

| Retention time | Fe (II)<br>(Fe 2p <sub>3/2</sub> ) | Fe (III)<br>(Fe 2p <sub>3/2</sub> ) | Fe (III)<br>(Fe 2p <sub>3/2</sub> satellite) | Fe (III)<br>(Fe 2p <sub>1/2</sub> ) |
|----------------|------------------------------------|-------------------------------------|----------------------------------------------|-------------------------------------|
| 10 min         | 15.0%                              | 53.4%                               | 4.4%                                         | 27.2%                               |
| 20 min         | 21.1%                              | 48.2%                               | 3.2%                                         | 27.5%                               |
| 30 min         | 24.8%                              | 42.7%                               | 3.8%                                         | 28.7%                               |

**Table S4.** Relative atomic percentages of O 1s on FONP@RIP after H<sub>2</sub>O<sub>2</sub> activation.

| Retention time | Lattice oxygen | Oxygen vacancies | C-O   |
|----------------|----------------|------------------|-------|
| 10 min         | 47.5%          | 36.1%            | 16.4% |
| 20 min         | 32.6%          | 55.6%            | 11.8% |
| 30 min         | 27.5%          | 64.1%            | 8.4%  |

**Table S5.** Relative atomic percentages of N 1s on FONP@RIP after TC adsorption (FONP@RIP-TC) and after H<sub>2</sub>O<sub>2</sub> activation (FONP@RIP/H<sub>2</sub>O<sub>2</sub>-TC).

| Sample                                     | -NH <sub>2</sub> | Graphitic N | Oxidized N |
|--------------------------------------------|------------------|-------------|------------|
| FONP@RIP-TC                                | 13.1%            | 86.9%       | n.d.       |
| FONP@RIP/H <sub>2</sub> O <sub>2</sub> -TC | 71.7%            | n.d.        | 28.3%      |

n.d.: not detected.

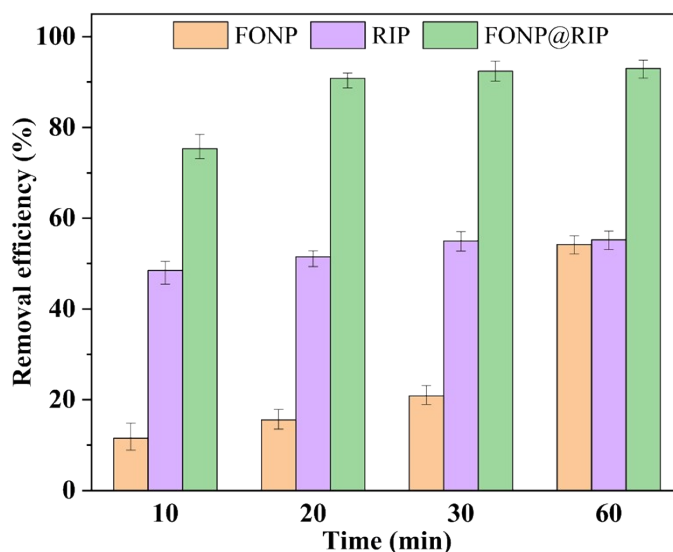**Fig. S4.** Comparison of degradation efficiency of TC in FONP/H<sub>2</sub>O<sub>2</sub>, RIP/H<sub>2</sub>O<sub>2</sub>, and FONP@RIP/H<sub>2</sub>O<sub>2</sub> system. ([TC]<sub>0</sub> = 150 ppm, FONP@RIP dosage = 0.5 g/L, [H<sub>2</sub>O<sub>2</sub>]<sub>0</sub> = 5 mM, and initial pH = 3).

**Table S6.** Toxicity estimates of intermediates by the ECOSAR program. Red boxes, very toxic (< 1 mg/L); blue boxes, toxic (1-10 mg/L); orange boxes, harmful (10-100 mg/L); green boxes, not harmful (> 100 mg/L).

| Compound | m/z | Acute toxicity (mg/L)    |                             |                                 | Chronic toxicity (ChV, mg/L) |                      |                      | Hazard category |
|----------|-----|--------------------------|-----------------------------|---------------------------------|------------------------------|----------------------|----------------------|-----------------|
|          |     | Fish (LC <sub>50</sub> ) | Daphnid (LC <sub>50</sub> ) | Green Algae (EC <sub>50</sub> ) | Fish                         | Daphnid              | Green Algae          |                 |
| TC       | 445 | 61.44                    | 4.49                        | 10.24                           | 0.96                         | 1.04                 | 2.52                 | Toxic           |
| ATC      | 427 | 20.92                    | 2.14                        | 2.26                            | 0.27                         | 0.45                 | 0.79                 | Toxic           |
| 1        | 461 | 34.21                    | 2.30                        | 5.21                            | 0.29                         | 0.49                 | 0.85                 | Toxic           |
| 2        | 417 | 90.58                    | 5.72                        | 18.27                           | 1.54                         | 1.38                 | 3.84                 | Toxic           |
| 3        | 410 | 16.14                    | 2.21                        | 2.53                            | 0.24                         | 0.47                 | 0.86                 | Toxic           |
| 4        | 509 | 388.36                   | 1293.00                     | 19.01                           | 97.44                        | 24.15                | 5.00                 | Harmful         |
| 5        | 477 | 6.26                     | 1.09                        | 1.33                            | 0.08                         | 0.21                 | 0.25                 | Toxic           |
| 6        | 444 | 59.42                    | 3.84                        | 13.38                           | 0.68                         | 0.87                 | 1.96                 | Toxic           |
| 7        | 426 | 4.62                     | 0.89                        | 1.02                            | 0.06                         | 0.17                 | 0.20                 | Toxic           |
| 8        | 480 | 181.56                   | 535.53                      | 10.09                           | 23.60                        | 8.01                 | 2.88                 | Harmful         |
| 9        | 341 | 10.06                    | 1.21                        | 0.88                            | 0.12                         | 0.25                 | 0.37                 | Toxic           |
| 10       | 339 | 9.71                     | 1.18                        | 0.83                            | 0.12                         | 0.24                 | 0.35                 | Toxic           |
| 11       | 316 | 0.61                     | 20.78                       | 1.38                            | 0.04                         | 2.96                 | 1.37                 | Toxic           |
| 12       | 314 | 3.17                     | 2.55                        | 0.18                            | 0.42                         | 0.26                 | 1.14                 | Toxic           |
| 13       | 312 | 2.93                     | 2.38                        | 0.17                            | 0.39                         | 0.25                 | 1.09                 | Toxic           |
| 14       | 276 | 7.91                     | 22.23                       | 0.68                            | 3.73                         | 1.54                 | 4.89                 | Toxic           |
| 15       | 359 | 6.95                     | 0.98                        | 0.53                            | 0.08                         | 0.19                 | 0.25                 | Toxic           |
| 16       | 525 | 98.57                    | 117.25                      | 7.09                            | 18.69                        | 9.65                 | 32.04                | Toxic           |
| 17       | 342 | 2.32                     | 1.95                        | 0.15                            | 0.32                         | 0.21                 | 0.97                 | Toxic           |
| 18       | 298 | 2.26×10 <sup>6</sup>     | 4.28×10 <sup>5</sup>        | 4.68×10 <sup>4</sup>            | 2.61×10 <sup>4</sup>         | 2.11×10 <sup>4</sup> | 1.01×10 <sup>4</sup> | Not Harmful     |
| 19       | 183 | 349.63                   | 137.36                      | 30.53                           | 33.88                        | 14.48                | 61.55                | Harmful         |
| 20       | 426 | 9.28                     | 1.83                        | 1.63                            | 0.16                         | 0.38                 | 0.62                 | Toxic           |
| 21       | 367 | 1.79×10 <sup>5</sup>     | 4.56×10 <sup>4</sup>        | 6196.09                         | 1.20×10 <sup>4</sup>         | 2810.79              | 2.18×10 <sup>4</sup> | Not Harmful     |
| 22       | 496 | 1153.85                  | 4657.02                     | 239.55                          | 2911.17                      | 1351.56              | 2221.50              | Not Harmful     |
| 23       | 333 | 145.58                   | 3.71                        | 15.79                           | 0.86                         | 0.87                 | 2.21                 | Toxic           |
| 24       | 260 | 6.34                     | 17.32                       | 0.51                            | 2.44                         | 1.08                 | 3.59                 | Toxic           |
| 25       | 175 | 3.39                     | 2.56                        | 0.31                            | 0.38                         | 0.35                 | 0.89                 | Toxic           |
| 26       | 357 | 13.06                    | 1.30                        | 2.28                            | 0.13                         | 0.26                 | 0.40                 | Toxic           |
| 27       | 253 | 2.32×10 <sup>7</sup>     | 7.83×10 <sup>6</sup>        | 6.82×10 <sup>5</sup>            | 1.23×10 <sup>6</sup>         | 1.80×10 <sup>5</sup> | 5.62×10 <sup>4</sup> | Not Harmful     |
| 28       | 308 | 1.47                     | 1.66                        | 0.14                            | 0.18                         | 0.26                 | 0.49                 | Toxic           |
| 29       | 351 | 2.11×10 <sup>4</sup>     | 6702.04                     | 1077.80                         | 1625.22                      | 490.10               | 4065.73              | Not Harmful     |
| 30       | 256 | 11.96                    | 36.59                       | 1.26                            | 10.42                        | 3.54                 | 9.65                 | Toxic           |
| 31       | 146 | 1.50×10 <sup>4</sup>     | 6887.14                     | 2102.55                         | 1140.55                      | 368.46               | 340.56               | Not Harmful     |
| 32       | 116 | 5.33×10 <sup>4</sup>     | 2.53×10 <sup>4</sup>        | 8964.33                         | 4216.20                      | 1496.17              | 1573.47              | Not Harmful     |
| 33       | 100 | 2.10                     | 1.19×10 <sup>4</sup>        | 3592.18                         | 0.17                         | 607.51               | 315.94               | Toxic           |
| 34       | 85  | 0.19                     | 10.18                       | 1.84                            | 0.02                         | 1.72                 | 0.59                 | Toxic           |
| 35       | 90  | 1.68×10 <sup>5</sup>     | 6.75×10 <sup>4</sup>        | 1.21×10 <sup>4</sup>            | 1.09×10 <sup>4</sup>         | 2519.06              | 1466.06              | Not Harmful     |
| 36       | 61  | 556.80                   | 49.33                       | 73.20                           | 80.07                        | 3.04                 | 19.62                | Harmful         |
| 37       | 61  | 1.52×10 <sup>5</sup>     | 6.02×10 <sup>4</sup>        | 1.02×10 <sup>4</sup>            | 9714.58                      | 2167.92              | 1205.14              | Not Harmful     |

**Table S7.** Comparison of the TC degradation performance in the FONP@RIP/H<sub>2</sub>O<sub>2</sub> system with those of other reported heterogeneous catalysts.

| Catalyst                                      | pH   | TC initial conc. (ppm) | Conc. of catalyst and H <sub>2</sub> O <sub>2</sub> | Removal of TC and HRT | Degradation rate <sup>a</sup> (mmol.g <sup>-1</sup> .min <sup>-1</sup> ) | Ref.       |
|-----------------------------------------------|------|------------------------|-----------------------------------------------------|-----------------------|--------------------------------------------------------------------------|------------|
| Ca <sub>0.9</sub> FeO <sub>3-δ</sub>          | 3    | 50                     | 0.1 g/L, 20 mM                                      | 88.3%, 150 min        | 2.4×10 <sup>-3</sup>                                                     | 1          |
| Fe-MPC                                        | 4.3  | 40                     | 0.02 g/L, 1 mM                                      | 83.0%, 10 min         | 1.7×10 <sup>-3</sup>                                                     | 2          |
| Cu <sub>2.5</sub> Ni <sub>0.5</sub> Co-LDH/GO | 10.2 | 20                     | 0.06 g/L, 10 mM                                     | 96.5%, 40 min         | 1.4×10 <sup>-3</sup>                                                     | 3          |
| CuFeO <sub>2</sub> /BC                        | 6.27 | 20                     | 0.6 g/L, 57.6 mM                                    | 89.1%, 300 min        | 1.8×10 <sup>-3</sup>                                                     | 4          |
| 14Fe <sub>3</sub> O <sub>4</sub> -Cs beads    | 3    | 48                     | 0.5 g/L, 10 mM                                      | 96.2%, 120 min        | 1.7×10 <sup>-3</sup>                                                     | 5          |
| FeNi <sub>3</sub> @SiO <sub>2</sub>           | 7    | 20                     | 0.1 g/L, 200 mM                                     | 73.1%, 180 min        | 1.8×10 <sup>-3</sup>                                                     | 6          |
| FONP@RIP                                      | 4    | 150                    | 0.5 g/L, 5 mM                                       | 94.5%, 60 min         | 1.1×10 <sup>-2</sup>                                                     | This study |

<sup>a</sup> TC degradation rate =  $\frac{M_{TC_0} - M_{TC_t}}{C.t}$ , where  $M_{TC_0}$  is the initial molar concentration (mM) of TC;  $M_{TC_t}$  is the molar concentration (mM) of TC at time  $t$  (min);  $C$  is the concentration of catalyst (g/L);  $t$  is the reaction time (min).

## References

- 1 J. X. Li, W. C. Ma, D. Zhong, K. F. Li, J. Ma, S. B. Zhang and X. Du, Oxygen vacancy concentration modulation of perovskite-based heterogeneous catalysts for Fenton-like oxidation of tetracycline, *J. Clean. Prod.*, 2022, **362**, 132469.
- 2 C. Q. Wang, R. R. Sun, R. Huang and H. Wang, Superior fenton-like degradation of tetracycline by iron loaded graphitic carbon derived from microplastics: Synthesis, catalytic performance, and mechanism, *Sep. Purif. Technol.*, 2021, **270**, 118773.
- 3 Z. Z. Wu, Y. Y. Gu, S. S. Xin, L. L. Lu, Z. W. Huang, M. Y. Li, Y. F. Cui, R. B. Fu and S. B. Wang, Cu<sub>x</sub>Ni<sub>y</sub>Co-LDH nanosheets on graphene oxide: An efficient and stable Fenton-like catalyst for dual-mechanism degradation of tetracycline, *Chem. Eng. J.*, 2022, **434**, 134574.

- 4 S. Xin, G. Liu, X. Ma, J. Gong, B. Ma, Q. Yan, Q. Chen, D. Ma, G. Zhang, M. Gao and Y. Xin, High efficiency heterogeneous Fenton-like catalyst biochar modified CuFeO<sub>2</sub> for the degradation of tetracycline: Economical synthesis, catalytic performance and mechanism, *Appl. Catal. B Environ.*, 2021, **280**, 119386.
- 5 X. Y. Li, K. P. Cui, Z. Guo, T. T. Yang, Y. Cao, Y. P. Xiang, H. H. Chen and M. F. Xi, Heterogeneous Fenton-like degradation of tetracyclines using porous magnetic chitosan microspheres as an efficient catalyst compared with two preparation methods, *Chem. Eng. J.*, 2020, **379**, 122324.
- 6 M. Khodadadi, A. H. Panahi, T. J. Al-Musawi, M. H. Ehrampoush and A. H. Mahvi, The catalytic activity of FeNi<sub>3</sub>@SiO<sub>2</sub> magnetic nanoparticles for the degradation of tetracycline in the heterogeneous Fenton-like treatment method, *J. Water Process Eng.*, 2019, **32**, 100943.
